# Supplementary material for: The widely distributed soft coral Xenia umbellata exhibits high resistance against phosphate enrichment and temperature increase
Source: PubMed Central journal article supplement (PMC9780247; doi:10.1038/s41598-022-26325-5), 2022-12-22
Supplement: 41598_2022_26325_MOESM1_ESM.pdf [file 41598_2022_26325_MOESM1_ESM.pdf]

**The widely distributed soft coral *Xenia umbellata* exhibits high resistance against  
phosphate enrichment and temperature increase**

**- Supplementary Material -**

Selma D. Mezger<sup>\*1</sup>, Annabell Klinke<sup>1,2</sup>, Arjen Tilstra<sup>1</sup>, Yusuf C. El-Khaled<sup>1</sup>, Bianca Thobor<sup>1</sup>, Christian Wild<sup>1</sup>

<sup>1</sup>University of Bremen, Faculty of Biology and Chemistry, Department of Marine Ecology, Leobener Str. 6, 28359  
Bremen, Germany

<sup>2</sup> Leibniz Centre for Tropical Marine Research, Fahrenheitstraße 6, 28359 Bremen, Germany

\*corresponding author: Selma D. Mezger, [mezger@uni-bremen.de](mailto:mezger@uni-bremen.de)

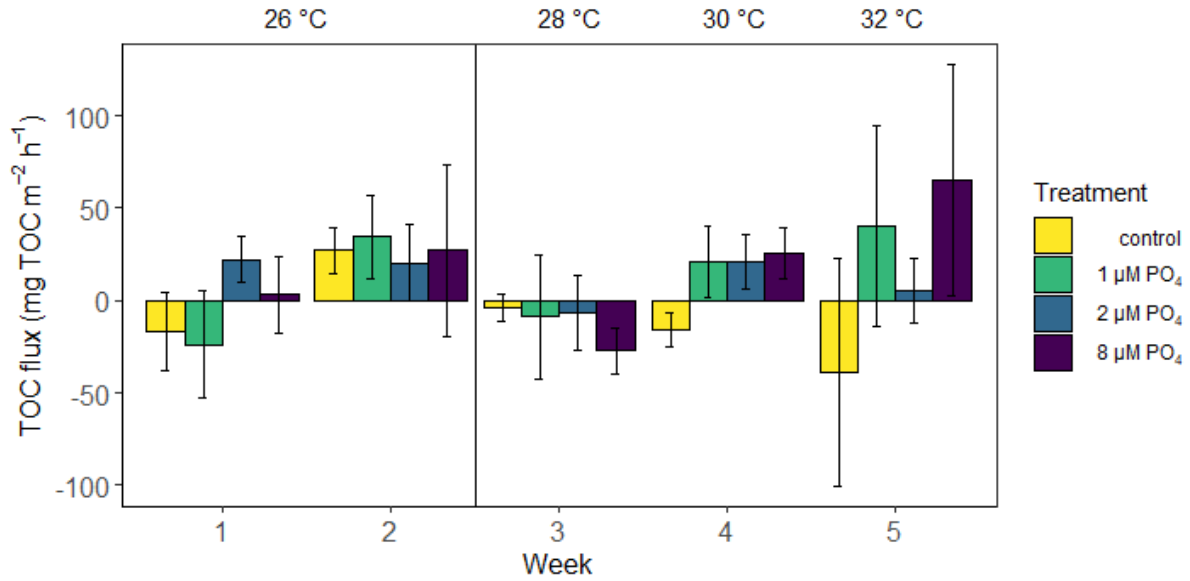

Figure S1. TOC fluxes of *Xenia umbellata* colonies under experimental conditions: only temperature increase without PO<sub>4</sub> addition (control), 1 μM PO<sub>4</sub> + temperature increased from week 3 onwards (1 μM PO<sub>4</sub>), 2 μM PO<sub>4</sub> + temperature increased (2 μM PO<sub>4</sub>), and 8 μM PO<sub>4</sub> + temperature increased (8 μM PO<sub>4</sub>). Error bars represent standard errors. The vertical line indicates the start of the temperature treatment and the average temperature for all tanks for the different time points is given on top of the graph.

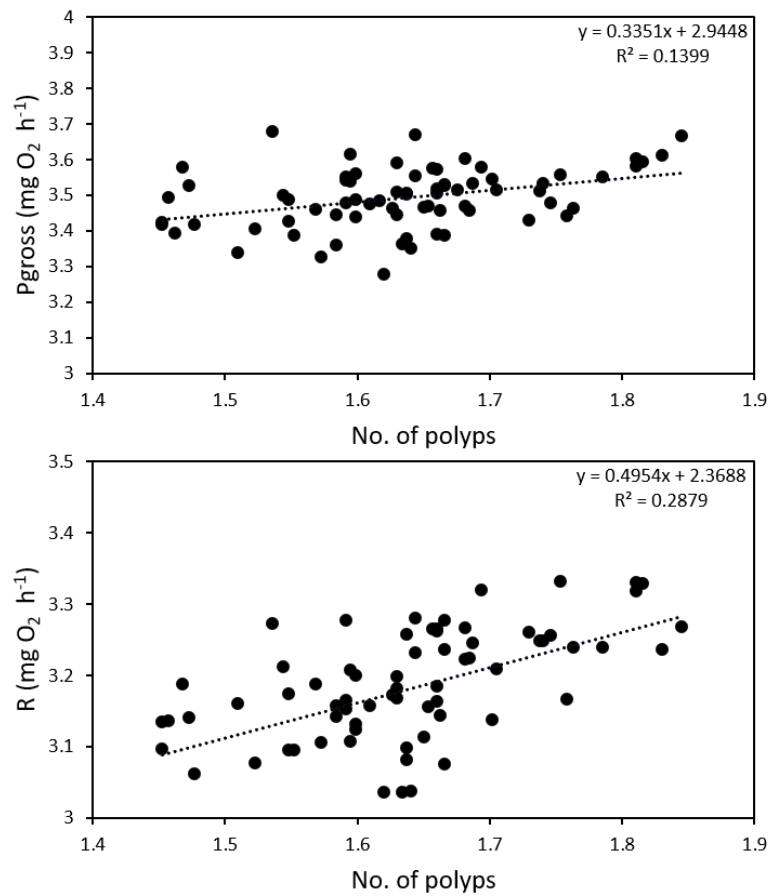

Figure S2. Correlation of log-transformed oxygen fluxes and number of polyps in *Xenia umbellata* colonies including all treatments.

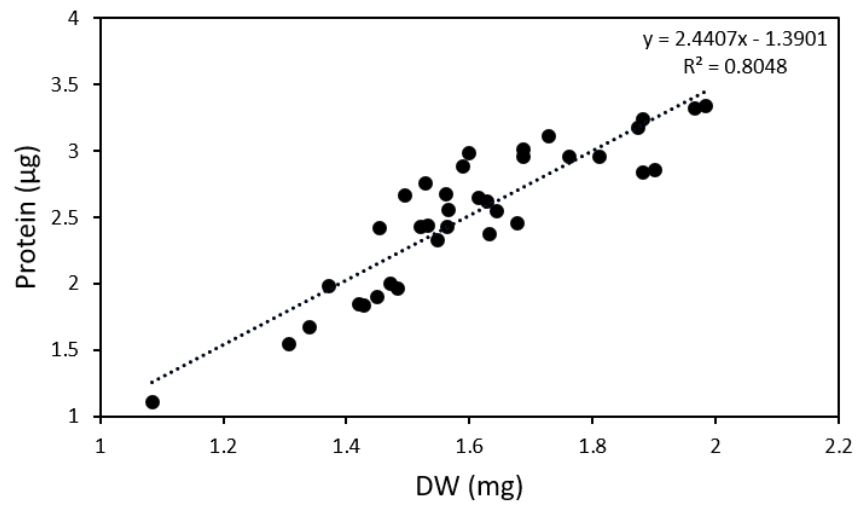

Figure S3. Correlation of log-transformed protein content and dry weight in *Xenia umbellata* colonies including all treatments.

Table S1. Experimental studies on effects of phosphate enrichment (PO<sub>4</sub>) and temperature increase (Temp.) on hard corals in comparison to the present study. Only parameters similar to the ones measured in the present study were summarized. N = nitrogen source, P = phosphate source, P<sub>gross</sub> = gross photosynthesis, P<sub>net</sub> = net photosynthesis, R = dark respiration, P/R = photosynthesis to respiration ratio

| Study                                   | Duration | Treatment                                                                                                                                                            | Coral species                                           | Parameter              | Effect                                                     |
|-----------------------------------------|----------|----------------------------------------------------------------------------------------------------------------------------------------------------------------------|---------------------------------------------------------|------------------------|------------------------------------------------------------|
| <b>EUTROPHICATION EXPERIMENTS</b>       |          |                                                                                                                                                                      |                                                         |                        |                                                            |
| Ferrier-Pagès et al. 2000 <sup>1</sup>  | 9 weeks  | 2 µM PO <sub>4</sub>                                                                                                                                                 | <i>Stylophora pistillata</i>                            | growth                 | Decrease (- 60 %)                                          |
|                                         |          |                                                                                                                                                                      |                                                         | P <sub>gross</sub>     | Increase (+ 100 %)                                         |
|                                         |          |                                                                                                                                                                      |                                                         | R                      | Increase (+ 59 %)                                          |
|                                         |          |                                                                                                                                                                      |                                                         | P/R                    | Increase (+ 47)                                            |
| Koop et al. 2001 <sup>2</sup>           | 406 days | 20 µM Ammonium and/or 4µM PO <sub>4</sub>                                                                                                                            | <i>Stylophora pistillata</i>                            | P <sub>gross</sub>     | P: decrease (- 19 %)<br>N+P: decrease (- 14 %)             |
|                                         |          |                                                                                                                                                                      |                                                         | R                      | n.s.                                                       |
| Stambler et al. 1991 <sup>3</sup>       | 28 days  | 0.5 and 2 µM PO <sub>4</sub>                                                                                                                                         | <i>Pocillopora damicornis</i>                           | Protein                | n.s.                                                       |
| Tanaka et al. 2017 <sup>4</sup>         | 2 months | Nitrate: 1.4-1.9 µM<br>PO <sub>4</sub> : 0.1 µM                                                                                                                      | <i>Montipora digitata</i>                               | Symbiont C content     | N: n.s.<br>N+P: Increase (+ 48 %)                          |
|                                         |          |                                                                                                                                                                      |                                                         | Symbiont N content     | N: Increase (NA)<br>N+P: Increase (NA)                     |
|                                         |          |                                                                                                                                                                      |                                                         | Host C + N content     | n.s.                                                       |
|                                         |          |                                                                                                                                                                      |                                                         | Host and Symbiont δ13C | N: Decrease (Host: - 6 %,<br>Symbiont: - 5 %)<br>N+P: n.s. |
| Hoegh-Guldberg et al. 2004 <sup>5</sup> | 406 days | 20 µM Ammonium and/or 4µM PO <sub>3</sub> <sup>2+</sup>                                                                                                              | <i>Heliofungia actiniformis</i>                         | Host δ15N              | P: Decrease (- 68 %)<br>N+P: Decrease (- 47 %)             |
|                                         |          |                                                                                                                                                                      |                                                         | Symbiont δ15N          | P: n.s.<br>N+P: Decrease (- 55 %)                          |
|                                         |          |                                                                                                                                                                      |                                                         | δ13C                   | n.s.                                                       |
|                                         |          |                                                                                                                                                                      | <i>Pocillopora damicornis</i>                           | Host δ15N              | P: n.s.<br>N+P: Decrease (- 55 %)                          |
|                                         |          |                                                                                                                                                                      |                                                         | Symbiont δ15N          | P: n.s.<br>N+P: Decrease (- 73 %)                          |
|                                         |          |                                                                                                                                                                      |                                                         | δ13C                   | n.s.                                                       |
| Silbiger et al. 2018 <sup>6</sup>       | 6 weeks  | medium (3.6 µmol l <sup>-1</sup> DIN + 1.08 µmol l <sup>-1</sup> PO <sub>4</sub> ); high (7.61 µmol l <sup>-1</sup> DIN + 2.6 µmol l <sup>-1</sup> PO <sub>4</sub> ) | <i>Porites compressa</i> and <i>Montipora caipitata</i> | R                      | Medium: Increase (+ 7 %)<br>High: Increase (+ 51 %)        |
|                                         |          |                                                                                                                                                                      |                                                         |                        |                                                            |
| <b>TEMPERATURE EXPERIMENTS</b>          |          |                                                                                                                                                                      |                                                         |                        |                                                            |
| Krueger et al. 2017 <sup>7</sup>        | 6 weeks  | 1-2 °C                                                                                                                                                               | <i>Stylophora pistillata</i>                            | P <sub>net</sub>       | Increase (+ 44 %)                                          |
| Schlöder and D' Croz 2004 <sup>8</sup>  | 30 days  | 1 °C                                                                                                                                                                 | <i>Pocillopora damicornis</i>                           | Protein                | n.s.                                                       |
|                                         |          |                                                                                                                                                                      |                                                         | <i>Porites lobata</i>  | Protein                                                    |
| Gibbin et al. 2018 <sup>9</sup>         | 7 days   | 2.5 °C                                                                                                                                                               | <i>Pocillopora damicornis</i>                           | P <sub>gross</sub>     | n.s.                                                       |
|                                         |          |                                                                                                                                                                      |                                                         | R                      | n.s.                                                       |
|                                         |          |                                                                                                                                                                      |                                                         | Protein                | n.s.                                                       |
|                                         |          |                                                                                                                                                                      |                                                         | δ13C                   | Warm-acclimated: increase in coral gastrodermis (14 %)     |
|                                         |          |                                                                                                                                                                      |                                                         | δ15N                   | Warm-acclimated: decrease in coral gastrodermis (- 81 %)   |

|                                           |         |              |                                                                                                                             |                                                                                                                              |                                                                                                                                                                                                                                                      |
|-------------------------------------------|---------|--------------|-----------------------------------------------------------------------------------------------------------------------------|------------------------------------------------------------------------------------------------------------------------------|------------------------------------------------------------------------------------------------------------------------------------------------------------------------------------------------------------------------------------------------------|
| Grover et al. 2011 <sup>10</sup>          | 10 days | 3 °C and 7°C | <i>Stylophora pistillata</i>                                                                                                | Protein<br>P <sub>gross</sub><br>R                                                                                           | 3/7 °C: n.s.<br>3 °C: n.s.<br>7 °C: -200 %<br>3/7 °C: n.s.                                                                                                                                                                                           |
| Rodrigues and Grottoli 2006 <sup>11</sup> | 1 month | 3 °C         | <i>Montipora capitata</i><br><i>Porites compressa</i>                                                                       | δ13C (host)<br>δ13C (symbiont)<br>δ15N<br>δ13C<br>δ15N                                                                       | n.s.<br>decrease (- 2 ‰)<br>n.s.<br>n.s.<br>n.s.                                                                                                                                                                                                     |
| Rodrigues and Grottoli 2007 <sup>12</sup> | 1 month | 3 °C         | <i>Montipora capitata</i><br><i>Porites compressa</i>                                                                       | Protein<br>P <sub>gross</sub><br>R<br>Protein<br>P <sub>gross</sub><br>R                                                     | n.s.<br>Decrease (- 67 %)<br>Decrease (- 45 %)<br>Decrease (- 36 %)<br>n.s.<br>n.s.                                                                                                                                                                  |
| Nyström et al. 2001 <sup>13</sup>         | 24 h    | 4 °C         | <i>Porites cylindrica</i>                                                                                                   | P <sub>gross</sub><br>R                                                                                                      | Decrease (- 50 %)<br>Decrease (- 57 %)                                                                                                                                                                                                               |
| Bahr et al. 2018 <sup>14</sup>            | 1 day   | 4 °C         | <i>Montipora capitata</i><br><i>Pocillopora damicornis</i><br><i>Leptastrea purpurea</i>                                    | P <sub>net</sub><br>R<br>P/R<br>P <sub>net</sub><br>R<br>P/R<br>P <sub>net</sub><br>R<br>P/R                                 | n.s.<br>n.s.<br>Decrease (- 23 %)<br>n.s.<br>Increase (+ 40 %)<br>Decrease (- 32 %)<br>Decrease (- 27 %)<br>n.s.<br>Decrease (- 39 %)                                                                                                                |
| Hoadley et al. 2015 <sup>15</sup>         | 24 days | 5 °C         | <i>Acropora millepora</i><br><i>Pocillopora damicornis</i><br><i>Montipora monasteriata</i><br><i>Turbinaria reniformis</i> | Protein<br>Fv/Fm<br>P/R<br>R<br>Protein<br>Fv/Fm<br>P/R<br>R<br>Protein<br>Fv/Fm<br>P/R<br>R<br>Protein<br>Fv/Fm<br>P/R<br>R | Decrease (- 31 %)<br>Decrease (- 14 %)<br>n.s.<br>n.s.<br>n.s.<br>Decrease (- 10 %)<br>n.s.<br>Increased (+ 47 %)<br>Decrease (- 28 %)<br>Decrease (- 15 %)<br>n.s.<br>Increased (+ 62 %)<br>Increase (+ 83 %)<br>n.s.<br>n.s.<br>Increased (+ 31 %) |
| Petrou et al. 2018 <sup>16</sup>          | 12 days | 5 °C         | <i>Acropora millepora</i>                                                                                                   | Fv/Fm                                                                                                                        | Significant decrease from day 9 onwards (- 35 %)                                                                                                                                                                                                     |
| Béraud et al. 2013 <sup>17</sup>          | 7 days  | 5 °C         | <i>Turbinaria reniformis</i>                                                                                                | Protein<br>P <sub>gross</sub><br>R<br>δ13C<br>δ15N                                                                           | n.s.<br>- 100 %<br>+ 64 %<br>n.s.<br>n.s.                                                                                                                                                                                                            |
| Courtial et al. 2017 <sup>18</sup>        | 5 weeks | 5 °C         | <i>Pocillopora damicornis</i><br><i>Turbinaria reniformis</i>                                                               | Protein<br>P <sub>net</sub><br>R<br>Protein<br>P <sub>net</sub><br>R                                                         | Decrease (- 60 %)<br>n.s.<br>n.s.<br>n.s.<br>n.s.<br>n.s.                                                                                                                                                                                            |

|                                         |                                            |                                                                             |                                              |                              |                                                            |
|-----------------------------------------|--------------------------------------------|-----------------------------------------------------------------------------|----------------------------------------------|------------------------------|------------------------------------------------------------|
| Ferrier-Pagès et al. 2010 <sup>19</sup> | 5 days                                     | 5 °C                                                                        | <i>Stylophora pistillata</i>                 | Fv/Fm                        | Decrease (- 18 %)                                          |
|                                         |                                            |                                                                             |                                              | P <sub>gross</sub>           | Decrease (- 60 %)                                          |
|                                         |                                            |                                                                             |                                              | R                            | Decrease (- 33 %)                                          |
|                                         |                                            |                                                                             | <i>Turbinaria reniformis</i>                 | Fv/Fm                        | Decrease (- 11 %)                                          |
|                                         |                                            |                                                                             |                                              | P <sub>gross</sub>           | Decrease (- 75 %)                                          |
|                                         |                                            |                                                                             |                                              | R                            | Decrease (- 66 %)                                          |
|                                         |                                            |                                                                             | <i>Galaxea fascicularis</i>                  | Fv/Fm                        | Decrease (- 33 %)                                          |
|                                         |                                            |                                                                             |                                              | P <sub>gross</sub>           | Decrease (- 51 %)                                          |
|                                         |                                            |                                                                             |                                              | R                            | Decrease (- 33 %)                                          |
| Baker et al. 2018 <sup>20</sup>         | 10 days                                    | 5 °C                                                                        | <i>Orbicella faveolata (shallow samples)</i> | % C content                  | Host: Decrease (- 15 %)<br>Symbiont: n.s.                  |
|                                         |                                            |                                                                             |                                              | δ <sup>15</sup> N (host)     | n.s.                                                       |
|                                         |                                            |                                                                             |                                              | δ <sup>15</sup> N (symbiont) | Increase (+ 32 %)                                          |
|                                         |                                            |                                                                             |                                              | δ <sup>13</sup> C (host)     | n.s.                                                       |
|                                         |                                            |                                                                             |                                              | δ <sup>13</sup> C (symbiont) | Increase (+ 14 %)                                          |
| Hoogenboom et al. 2012 <sup>21</sup>    | 10-13 days                                 | 6 °C                                                                        | <i>Stylophora pistillata</i>                 | P <sub>gross</sub> (unfed)   | Decrease (- 47 %)                                          |
|                                         |                                            |                                                                             |                                              | P <sub>gross</sub> (fed)     | n.s.                                                       |
|                                         |                                            |                                                                             |                                              | R                            | n.s.                                                       |
|                                         |                                            |                                                                             | <i>Turbinaria reniformis</i>                 | P <sub>gross</sub> (unfed)   | Decrease (- 39 %)                                          |
|                                         |                                            |                                                                             |                                              | P <sub>gross</sub> (fed)     | n.s.                                                       |
|                                         |                                            |                                                                             |                                              | R                            | n.s.                                                       |
| Grottoli et al. 2017 <sup>22</sup>      | 37 days                                    | 6 °C                                                                        | <i>Stylophora pistillata</i>                 | Protein                      | n.s.                                                       |
|                                         |                                            |                                                                             |                                              | δ <sup>13</sup> C (host)     | Increase (+ 2 ‰)                                           |
|                                         |                                            |                                                                             | <i>Pocillopora damicornis</i>                | Protein                      | n.s.                                                       |
|                                         |                                            |                                                                             |                                              | δ <sup>13</sup> C (host)     | n.s.                                                       |
|                                         |                                            |                                                                             |                                              | <i>Favia fava</i>            | Protein                                                    |
| δ <sup>13</sup> C (host)                | Increase (+ 2 ‰)                           |                                                                             |                                              |                              |                                                            |
| <b>COMBINED EXPERIMENTS</b>             |                                            |                                                                             |                                              |                              |                                                            |
| Hall et al. 2018 <sup>23</sup>          | 30 days                                    | 5 °C<br>Nutrients:<br>nitrate+nitrite<br>(1 μM)+PO <sub>4</sub> (0.0625 μM) | <i>Stylophora pistillata</i>                 | Fv/Fm                        | Temp.: decrease (NA)<br>Nutrients: n.s.<br>Comb.: n.s.     |
|                                         |                                            |                                                                             |                                              | P <sub>net</sub>             | Temp.: n.s.<br>Nutrients: decrease (- 34 %)<br>Comb.: n.s. |
|                                         |                                            |                                                                             |                                              | R                            | n.s.                                                       |
|                                         |                                            |                                                                             |                                              | Protein                      | Temp.: n.s.<br>Nutrients: decrease (- 24 %)<br>Comb.: n.s. |
|                                         |                                            |                                                                             |                                              |                              |                                                            |
| Ezzat et al. 2016 <sup>24</sup>         | 4 weeks eutrophication,<br>10 days warming | DIP: 2 μM<br>Temp.: 5 °C                                                    | <i>Pocillopora damicornis</i>                | R                            | DIP: - 50 %<br>Temp.: + 25 %<br>Comb.: + 44 %              |
|                                         |                                            |                                                                             |                                              | P <sub>gross</sub>           | DIP: n.s.<br>Temp.: - 50 %<br>Comb.: - 50 %                |
| Present study                           | 5 weeks, Temp.:<br>3 weeks                 | PO <sub>4</sub> : 1,2,8 μM<br>Temp.: 6 °C                                   | <i>Xenia umbellata</i>                       | P <sub>gross</sub>           | n.s.                                                       |
|                                         |                                            |                                                                             |                                              | R                            | n.s.                                                       |
|                                         |                                            |                                                                             |                                              | P/R                          | n.s.                                                       |
|                                         |                                            |                                                                             |                                              | Protein                      | Temp.: decrease (- 62 %)                                   |
|                                         |                                            |                                                                             |                                              | δ <sup>13</sup> C            | Temp.: Decrease (- 6.9 %)                                  |
|                                         |                                            |                                                                             |                                              | δ <sup>15</sup> N            | Temp.: Decrease (- 10 %)                                   |

## References

1. Ferrier-Pagès, C., Gattuso, J. P., Dallot, S. & Jaubert, J. Effect of nutrient enrichment on growth and photosynthesis of the zooxanthellate coral *Stylophora pistillata*. *Coral Reefs* **19**, 103–113 (2000).
2. Koop, K. *et al.* ENCORE: The Effect of Nutrient Enrichment on Coral Reefs. Synthesis of Results and Conclusions. *Mar. Pollut. Bull.* **42**, 91–120 (2001).
3. Stambler, N., Popper, N., Dubinsky, Z. & Stimson, J. Effects of nutrient enrichment and water motion on the coral *Pocillopora damicornis*. *Pacific Sci.* **45**, 299–307 (1991).
4. Tanaka, Y., Grottoli, A. G., Matsui, Y., Suzuki, A. & Sakai, K. Effects of nitrate and phosphate availability on the tissues and carbonate skeleton of scleractinian corals. *Mar. Ecol. Prog. Ser.* **570**, 101–112 (2017).
5. Hoegh-Guldberg, O., Muscatine, L., Goiran, C., Siggaard, D. & Marion, G. Nutrient-induced perturbations to  $\delta^{13}\text{C}$  and  $\delta^{15}\text{N}$  in symbiotic dinoflagellates and their coral hosts. *Mar. Ecol. Prog. Ser.* **280**, 105–114 (2004).
6. Silbiger, N. J. *et al.* Nutrient pollution disrupts key ecosystem functions on coral reefs. *Proc. R. Soc. B Biol. Sci.* **285**, (2018).
7. Krueger, T. *et al.* Common reef-building coral in the Northern Red Sea resistant to elevated temperature and acidification. *R. Soc. Open Sci.* **4**, (2017).
8. Schlöder, C. & D’Croz, L. Responses of massive and branching coral species to the combined effects of water temperature and nitrate enrichment. *J. Exp. Mar. Bio. Ecol.* **313**, 255–268 (2004).
9. Gibbin, E. M. *et al.* Short-Term Thermal Acclimation Modifies the Metabolic Condition of the Coral Holobiont. *Front. Mar. Sci.* **5**, (2018).
10. Grover, R. *et al.* Coral uptake of inorganic phosphorus and nitrogen negatively affected by simultaneous changes in temperature and pH. *PLoS One* **6**, 1–10 (2011).
11. Rodrigues, L. J. & Grottoli, A. G. Calcification rate and the stable carbon, oxygen, and nitrogen isotopes in the skeleton, host tissue, and zooxanthellae of bleached and recovering Hawaiian corals. *Geochim. Cosmochim. Acta* **70**, 2781–2789 (2006).
12. Rodrigues, L. J. & Grottoli, A. G. Energy reserves and metabolism as indicators of coral recovery from bleaching. *Limnol. Oceanogr.* **52**, 1874–1882 (2007).
13. Nyström, M., Nordemar, I. & Tedengren, M. Simultaneous and sequential stress from increased temperature and copper on the metabolism of the hermatypic coral *Porites cylindrica*. *Mar. Biol.* **138**, 1225–1231 (2001).
14. Bahr, K. D., Rodgers, K. S. & Jokiel, P. L. Ocean warming drives decline in coral metabolism while acidification highlights species-specific responses. *Mar. Biol. Res.* **14**, 924–935 (2018).
15. Hoadley, K. D. *et al.* Physiological response to elevated temperature and pCO<sub>2</sub> varies across four Pacific coral species: Understanding the unique host+symbiont response. *Nat. Publ. Gr.* **5**, 1–15 (2015).
16. Petrou, K., Nielsen, D. A. & Heraud, P. Single-Cell Biomolecular Analysis of Coral Algal Symbionts Reveals Opposing Metabolic Responses to Heat Stress and Expulsion. *Front. Mar. Sci.* **0**, 110 (2018).
17. Béraud, E., Gevaert, F., Rottier, C. & Ferrier-Pagès, C. The response of the scleractinian coral *Turbinaria reniformis* to thermal stress depends on the nitrogen status of the coral holobiont. *J. Exp. Biol.* **216**, 2665–2674 (2013).
18. Courtial, L., Roberty, S., Shick, J. M., Houlbrèque, F. & Ferrier-Pagès, C. Interactive effects of ultraviolet radiation and thermal stress on two reef-building corals. *Limnol. Oceanogr.* **62**, 1000–1013 (2017).
19. Ferrier-Pagès, C., Rottier, C., Beraud, E. & Levy, O. Experimental assessment of the feeding effort of three scleractinian coral species during a thermal stress: Effect on the rates of photosynthesis. *J. Exp. Mar. Bio. Ecol.* **390**, 118–124 (2010).
20. Baker, D. M., Freeman, C. J., Wong, J. C. Y., Fogel, M. L. & Knowlton, N. Climate change promotes

parasitism in a coral symbiosis. *ISME J.* **12**, 921–930 (2018).

21. Hoogenboom, M. O., Campbell, D. A., Beraud, E., DeZeeuw, K. & Ferrier-Pagès, C. Effects of light, food availability and temperature stress on the function of photosystem II and photosystem I of coral symbionts. *PLoS One* **7**, (2012).
22. Grottoli, A. G., Tchernov, D. & Winters, G. Physiological and Biogeochemical Responses of Super-Corals to Thermal Stress from the Northern Gulf of Aqaba, Red Sea. *Front. Mar. Sci.* **4**, (2017).
23. Hall, E. R. *et al.* Eutrophication may compromise the resilience of the Red Sea coral *Stylophora pistillata* to global change. *Mar. Pollut. Bull.* **131**, 701–711 (2018).
24. Ezzat, L., Maguer, J.-F. F., Grover, R. & Ferrier-Pagès, C. Limited phosphorus availability is the Achilles heel of tropical reef corals in a warming ocean. *Sci. Rep.* **6**, 1–11 (2016).
